# Supplementary material for: Bifunctional NaCl template for the synthesis of Si@graphitic carbon nanosheets as advanced anode materials for lithium ion batteries
Source: Royal Society of Chemistry journal article supplement (doi:10.1039/d0nj02547j), 2020-01-01
Supplement: d0nj02547j1.pdf [file d0nj02547j1.pdf]

## Supporting Information

### **Bifunctional NaCl Template for Synthesis of Si@Graphitic Carbon Nanosheets as Advanced Anode Materials for Lithium Ion Batteries**

Hongqiang Wang<sup>a,b</sup>, Yajun Ding<sup>a,b</sup>, Jiaying Nong<sup>a,b</sup>, Qichang Pan<sup>a,b,\*</sup>, Zhian Qiu<sup>a,b</sup>,  
Xiaohui Zhang<sup>c</sup>, Fenghua Zheng<sup>a,b,\*</sup>, Qiang Wu<sup>a,b</sup>, Youguo Huang<sup>a,b</sup>, Qingyu Li<sup>a,b</sup>

a School of Chemical and Pharmaceutical Sciences, Guangxi Normal University,  
Guilin, 541004, China

b Guangxi Key Laboratory of Low Carbon Energy Materials, Guangxi Normal  
University, Guilin, 541004, China

c Guangxi Key Laboratory for Electrochemical Energy Materials, Guangxi University,  
Nanning 416000, China

\*Corresponding author. Tel: 401 863-2685. E-mail: panqc0526@163.com (Q. Pan);  
zhengfh870627@163.com (F. Zheng).

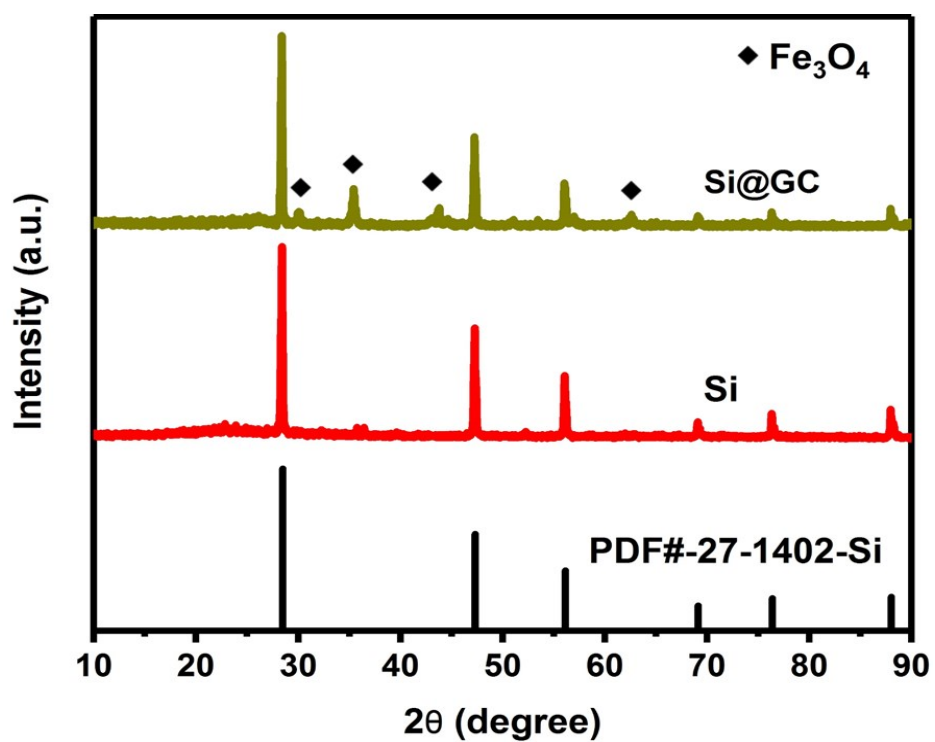

Fig. S1 XRD patterns of ball-milled Si and Si@GC nanosheets.

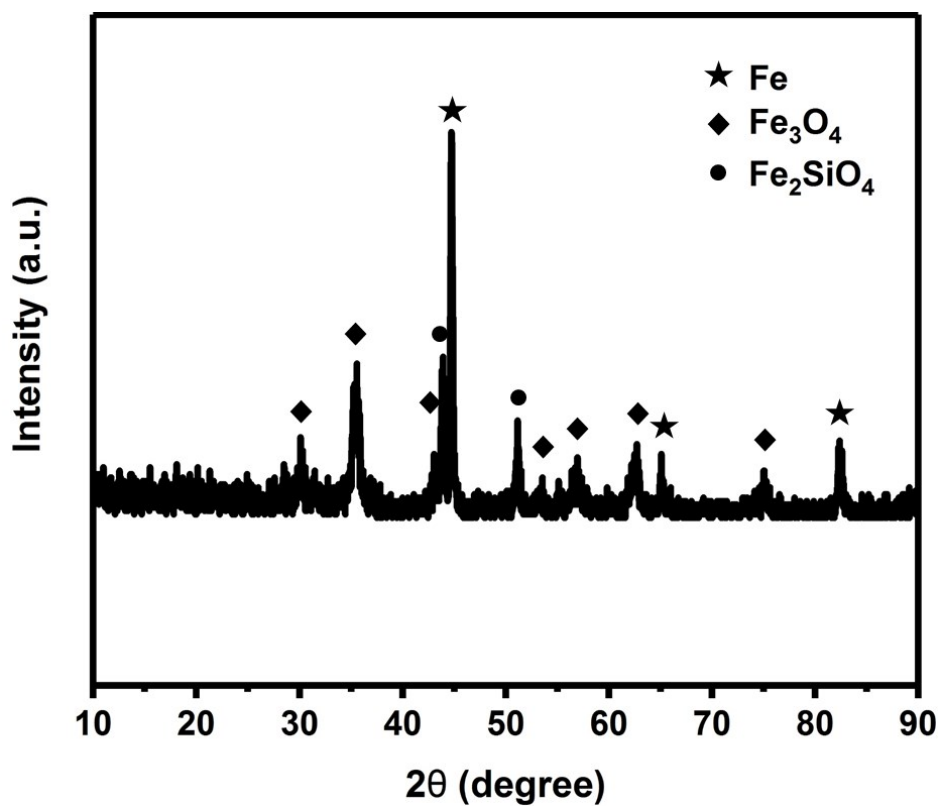

Fig. S2 XRD patterns of Fe-Si-O composite without added NaCl.

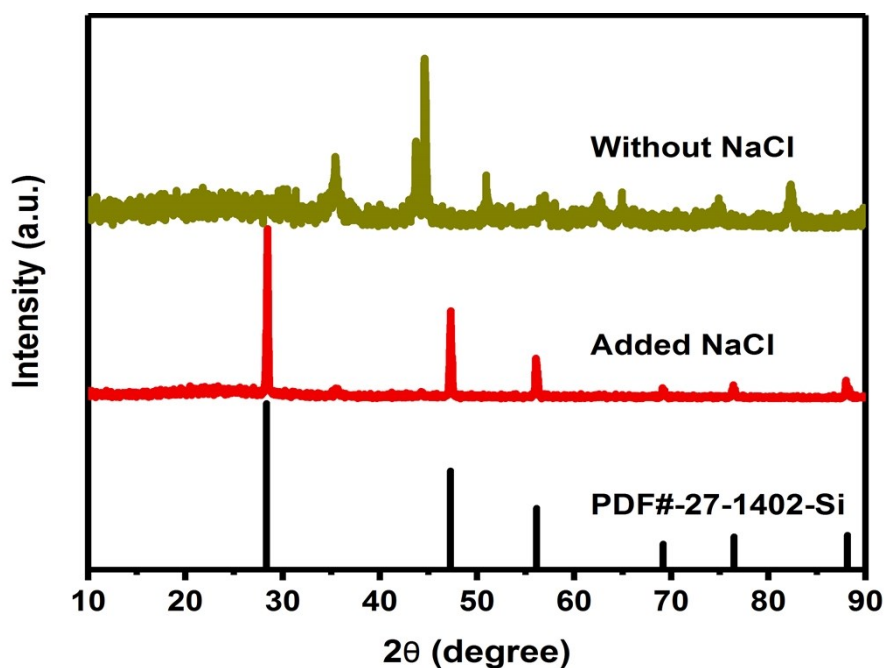

Fig. S3 XRD patterns of as-prepared composite used glucose as the sources.

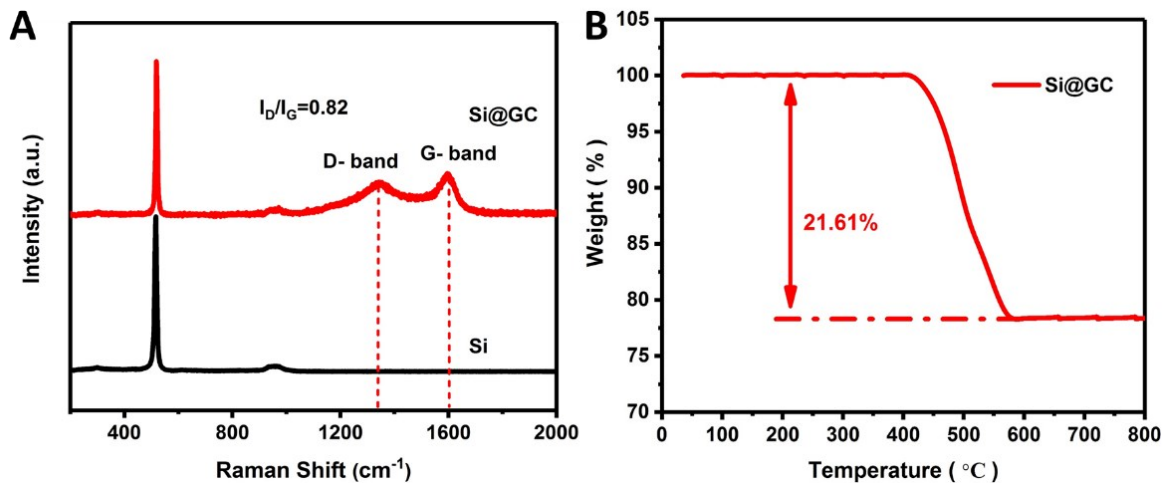

Fig. S4 (a) Raman spectra of Si and Si@GC nanosheets; (b) TGA curves of Si@GC nanosheets.

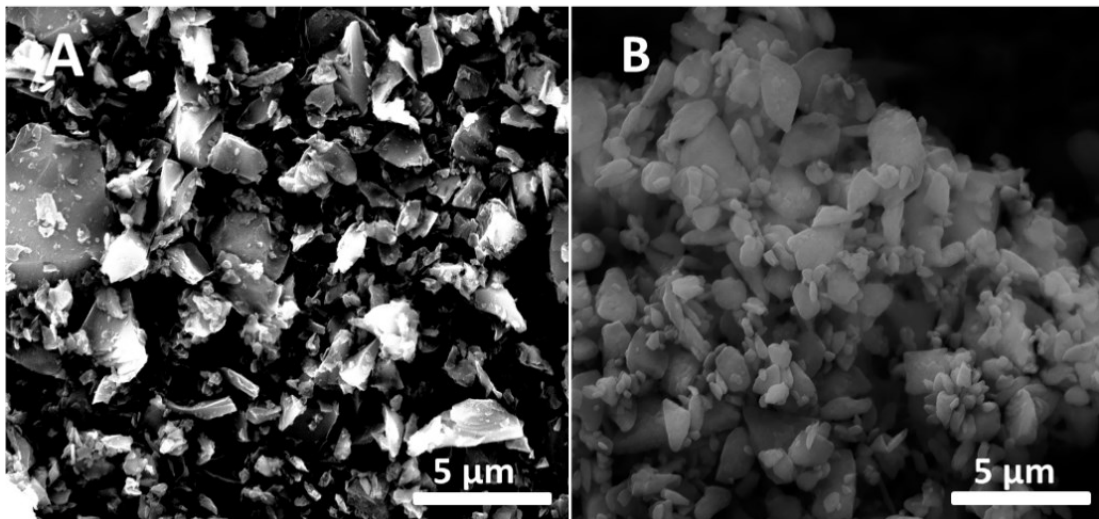

Fig. S5 SEM images of (A) commercial Si powder and (B) ball milled Si powder.

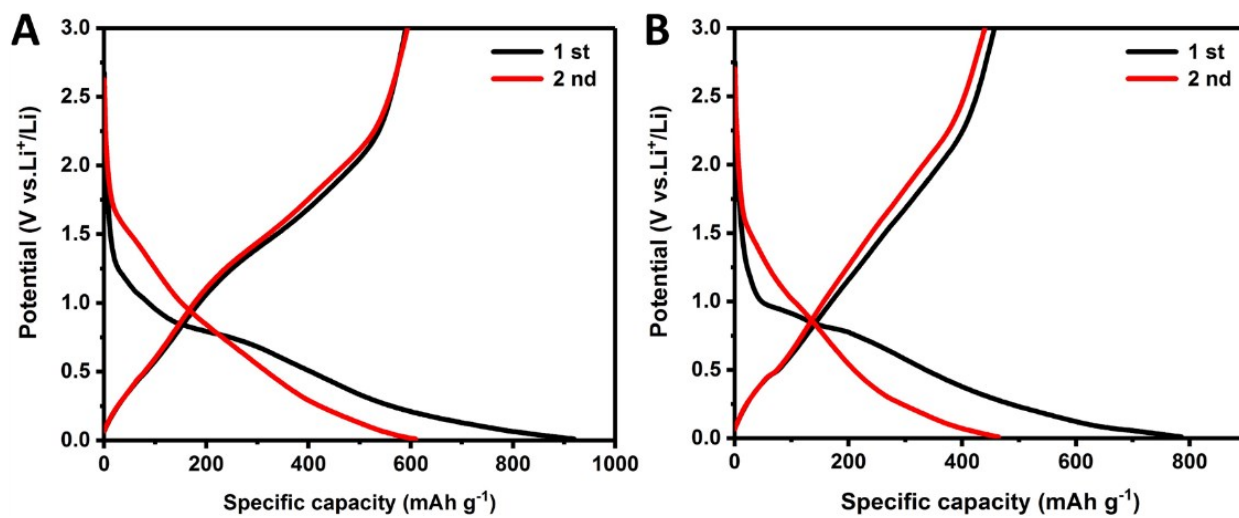

Fig. S6 Discharge and charge curves of as-prepared samples used (A) ascorbic acid and (B) glucose as the sources without added NaCl, respectively.

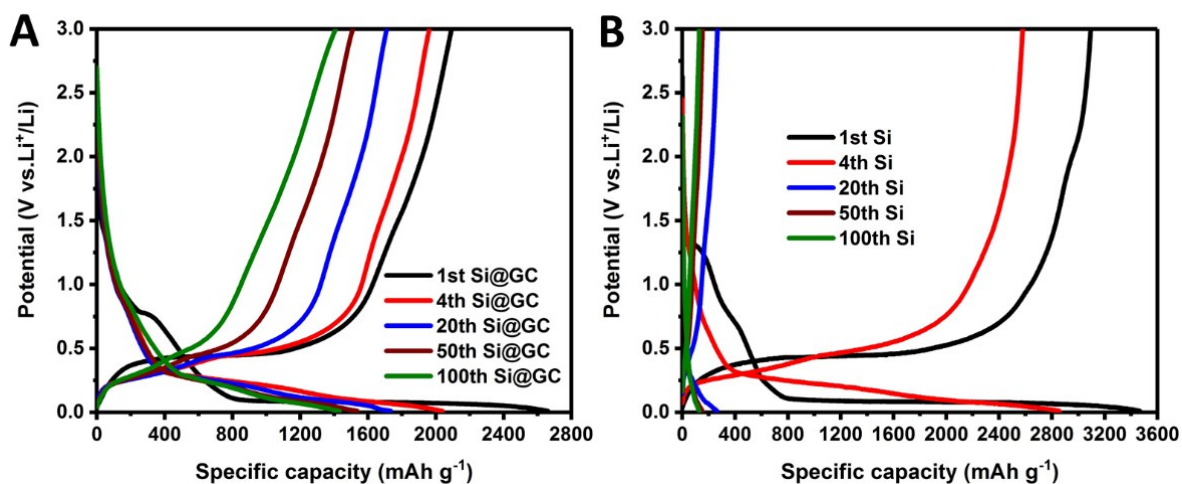

Fig. S7 Discharge/charge profiles of (A) Si@GC nanosheets and (B) pure Si under different cycles.

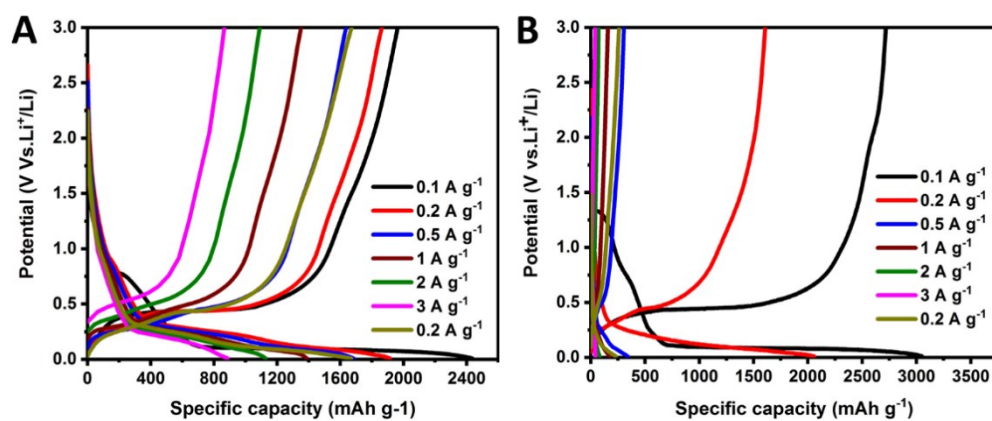

Fig. S8 Discharge/charge profiles of (A) Si@GC nanosheets and (B) pure Si under different current densities.

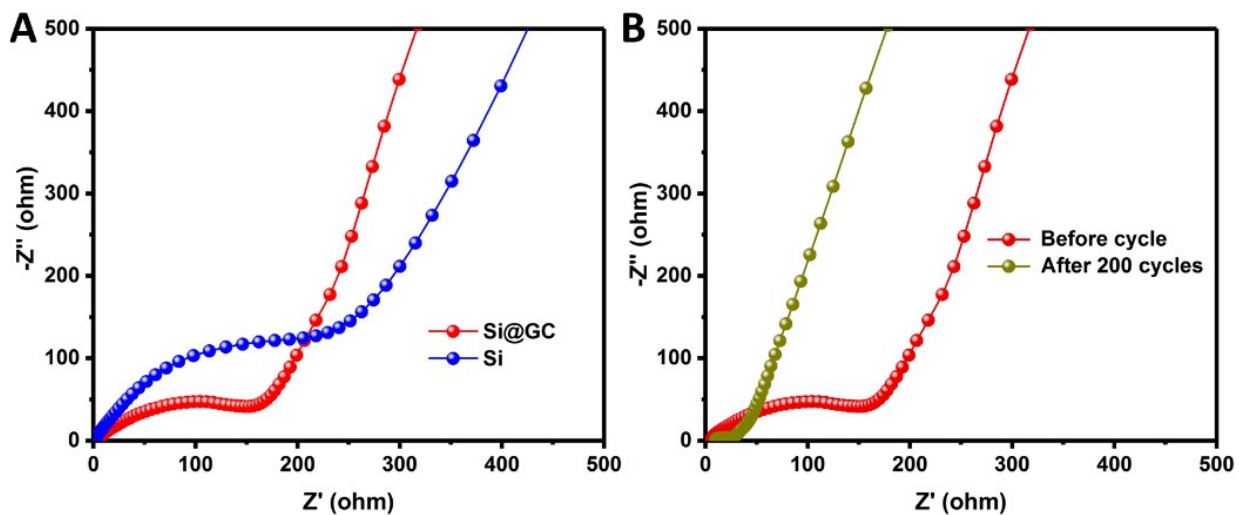

**Fig. S9** (A) Nyquist plots of Si and Si@GC electrodes before cycling; (B) before and after 200 th cycle of Si@GC composite at  $0.5 \text{ A g}^{-1}$

**Table S1 Compared with electrochemical performance of 2D Si@GC nanosheets with previous reported Si-based anode materials.**

| Materials                                  | Current density | Initial discharge/charge specific capacity ( mAh/g ) | Reversible capacity (mAh/g)/ cycle number (n) | Ref.      |
|--------------------------------------------|-----------------|------------------------------------------------------|-----------------------------------------------|-----------|
| ternary SiGC composite                     | 0.5A/g          | 1016/818                                             | 610/300                                       | [42]      |
| core-shell yolk-shell Si@C@void@C          | 0.5A/g          | -                                                    | 1366/50                                       | [47]      |
| silicon/carbon nanosheets                  | 300 mA/g        | 1256/901                                             | 655/100                                       | [40]      |
| The p-Si-Ag/C composites                   | 0.2A/g          | 1566.7/1028.8                                        | Over 1000/200                                 | [51]      |
| the sandwich-structured Si@C-rGO composite | 300 mA/g        | 1352.7/1001                                          | 930.9/400                                     | [21]      |
| Silicon/Wolfram Carbide@Graphene composite | 0.1A/g          | 1297/892                                             | 535/250                                       | [15]      |
| Si nanosheets@C composite                  | 0.1A/g          | 1846/719                                             | 822/200                                       | [27]      |
| Si@Graphitic Carbon Nanosheets             | 0.5A/g          | 2662.3/ 2092.2                                       | 1450.7/400                                    | This work |
